# Supplementary material for: International pooled patient-level meta-analysis of ketamine infusion for depression: In search of clinical moderators
Source: PubMed Central journal article supplement (PMC9763119; doi:10.1038/s41380-022-01757-7), 2022-09-07

## International Pooled Patient-Level Metaanalysis of Ketamine Infusion for Depression: In Search of Clinical Moderators

### *Supplemental Information #2*

#### **Information provided in each table below**

The following tables provide the moderator effect sizes, confidence intervals, hypothesis test results, and moderator weights. These tables are presented separately for each M\* model (Tier 1, Tiers 2a-2g), first for the rapid (~24-hour effect) outcome and then for the post-rapid (~7-day) outcome. In table headings, “Moderator effect size” denotes the effect size (r-value) of each variable operating as the sole moderator. To construct 95% confidence intervals, we used bootstrap confidence intervals with 200 resamples; the bootstrap was used as it’s robust to nested data, allowing for valid inference when comparing across different studies. The significance column denotes whether the effect size is significantly different from 0. The weight column displays the weight each variable (moderator) is given in generating the combined moderator. Lastly, all tables include a variable called “Overall” which corresponds to the combined moderator (M\*) for that specific Tier/outcome.

#### **Information provided in each figure below**

Figures below display the estimated outcome as a function of combined moderator (M\*) scores and treatment. Additionally, the points correspond to each patients’ combined moderator score and their observed outcome measurement. Figures can be used to help identify the differing behavior of the outcome as a function of the combined moderator score for each treatment group. They display how the combined moderator interacts with treatment group when estimating the outcome.

# Rapid effects

## Tier 1

| Variable                           | Moderator effect size (r) | Confidence interval | Statistically significant (per 95% CI)? | Weight |
|------------------------------------|---------------------------|---------------------|-----------------------------------------|--------|
| Study-level TRD Threshold $\geq 2$ | 0.083                     | (0.020, 0.162)      | Yes                                     | 0.118  |
| Inpatient vs. Outpatient           | 0.040                     | (-0.040, 0.106)     | No                                      | -0.037 |
| Major Depressive Disorder (MDD)    | -0.012                    | (-0.080, 0.051)     | No                                      | -0.145 |
| Study Performed in the US (y/n)    | 0.041                     | (-0.032, 0.115)     | No                                      | -0.092 |
| Age                                | 0.028                     | (-0.049, 0.094)     | No                                      | -0.006 |
| Female or Male                     | 0.035                     | (-0.029, 0.116)     | No                                      | 0.197  |
| Overall                            | 0.125                     | (0.045, 0.196)      | Yes                                     |        |

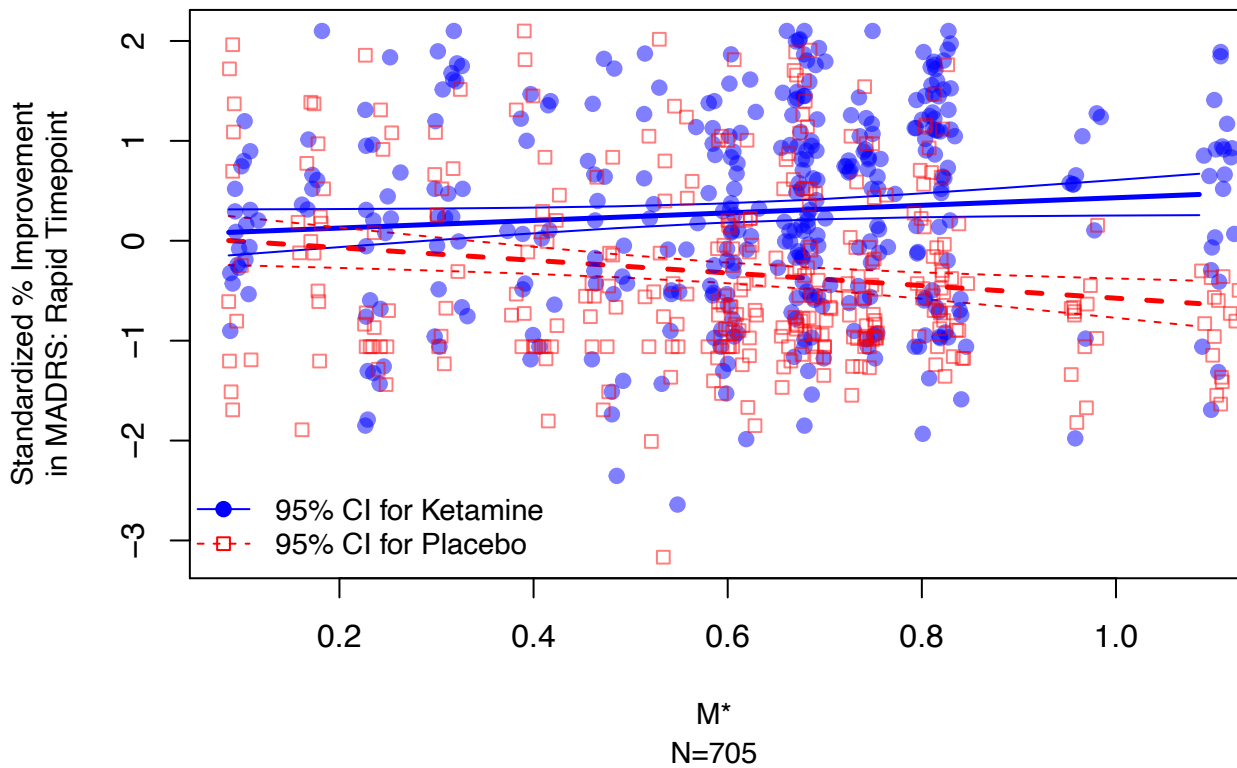

Tier2a

| Variable                        | Moderator effect size (r) | Confidence interval | Statistically significant (per 95% CI)? | Weight |
|---------------------------------|---------------------------|---------------------|-----------------------------------------|--------|
| Study-level TRD Threshold >= 2  | 0.071                     | (-0.008, 0.139)     | No                                      | 0.3    |
| Inpatient vs. Outpatient        | 0.059                     | (-0.018, 0.139)     | No                                      | 0.021  |
| Major Depressive Disorder (MDD) | -0.022                    | (-0.099, 0.047)     | No                                      | -0.039 |
| Study Performed in the US (y/n) | 0.074                     | (0.007, 0.139)      | Yes                                     | 0.459  |
| Age                             | 0.037                     | (-0.035, 0.113)     | No                                      | -0.142 |
| Female or Male                  | 0.022                     | (-0.043, 0.096)     | No                                      | 0.318  |
| Race is White (y/n)             | 0.017                     | (-0.065, 0.099)     | No                                      | 0.174  |
| Race is Black (y/n)             | 0.004                     | (-0.090, 0.112)     | No                                      | 0      |
| Race is Asian (y/n)             | -0.002                    | (-0.071, 0.058)     | No                                      | -0.186 |
| Race is Other (y/n)             | -0.031                    | (-0.105, 0.060)     | No                                      | -0.531 |
| Overall                         | 0.124                     | (0.060, 0.198)      | Yes                                     |        |

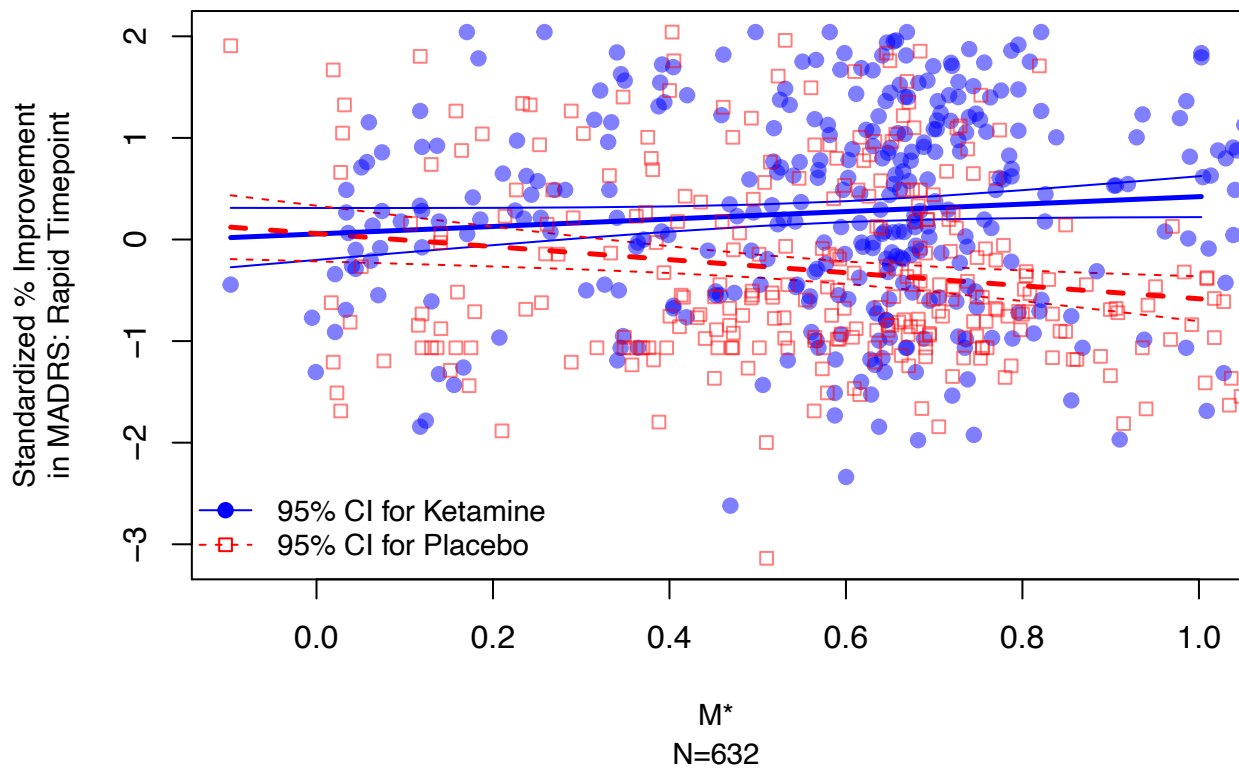

Tier2b

| Variable                           | Moderator effect size (r) | Confidence interval | Statistically significant (per 95% CI)? | Weight |
|------------------------------------|---------------------------|---------------------|-----------------------------------------|--------|
| Study-level TRD Threshold $\geq 2$ | 0.139                     | (0.057, 0.229)      | Yes                                     | 0.864  |
| Inpatient vs. Outpatient           | 0.062                     | (-0.033, 0.131)     | No                                      | -0.053 |
| Major Depressive Disorder (MDD)    | -0.020                    | (-0.102, 0.068)     | No                                      | -0.748 |
| Study Performed in the US (y/n)    | 0.116                     | (0.024, 0.195)      | Yes                                     | 0.095  |
| Age                                | 0.069                     | (-0.008, 0.146)     | No                                      | 0.041  |
| Female or Male                     | 0.060                     | (-0.029, 0.135)     | No                                      | 0.009  |
| Any Concurrent Psych Med (y/n)     | 0.030                     | (-0.055, 0.115)     | No                                      | -0.352 |
| Any Benzodiazepine (y/n)           | -0.018                    | (-0.104, 0.061)     | No                                      | 0.115  |
| Overall                            | 0.196                     | (0.120, 0.278)      | Yes                                     |        |

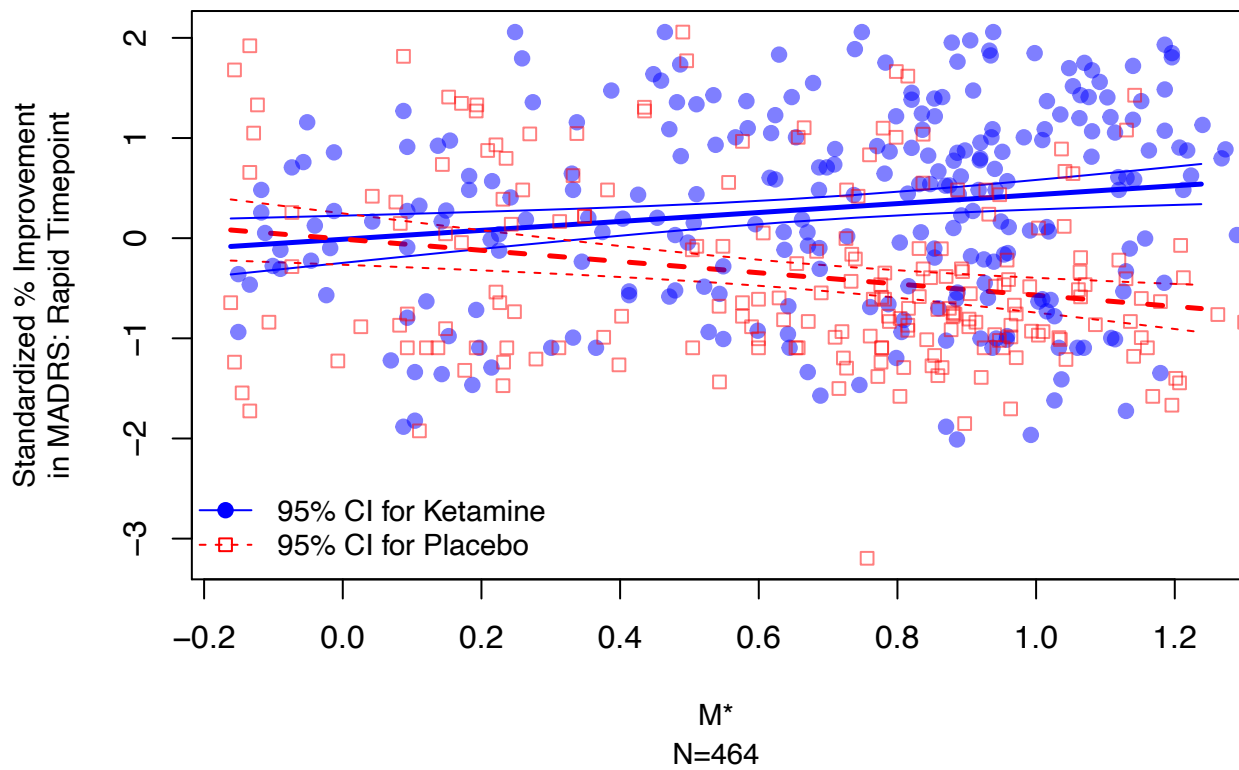

Tier2c

| Variable                         | Moderator effect size (r) | Confidence interval | Statistically significant (per 95% CI)? | Weight |
|----------------------------------|---------------------------|---------------------|-----------------------------------------|--------|
| Study-level TRD Threshold >= 2   | 0.099                     | (-0.009, 0.201)     | No                                      | 0.506  |
| Inpatient vs. Outpatient         | -0.030                    | (-0.140, 0.089)     | No                                      | 0.184  |
| Major Depressive Disorder (MDD)  | -0.074                    | (-0.167, 0.034)     | No                                      | -0.673 |
| Study Performed in the US (y/n)  | 0.049                     | (-0.045, 0.132)     | No                                      | 0.563  |
| Age                              | 0.052                     | (-0.040, 0.153)     | No                                      | 0.215  |
| Female or Male                   | 0.030                     | (-0.079, 0.133)     | No                                      | -0.033 |
| Duration of Current MDE (months) | 0.051                     | (-0.050, 0.155)     | No                                      | 0.188  |
| Recurrent MDD (y/n)              | 0.035                     | (-0.065, 0.134)     | No                                      | 0.051  |
| Number of Depressive Episodes    | 0.062                     | (-0.022, 0.161)     | No                                      | -0.053 |
| Overall                          | 0.202                     | (0.102, 0.280)      | Yes                                     |        |

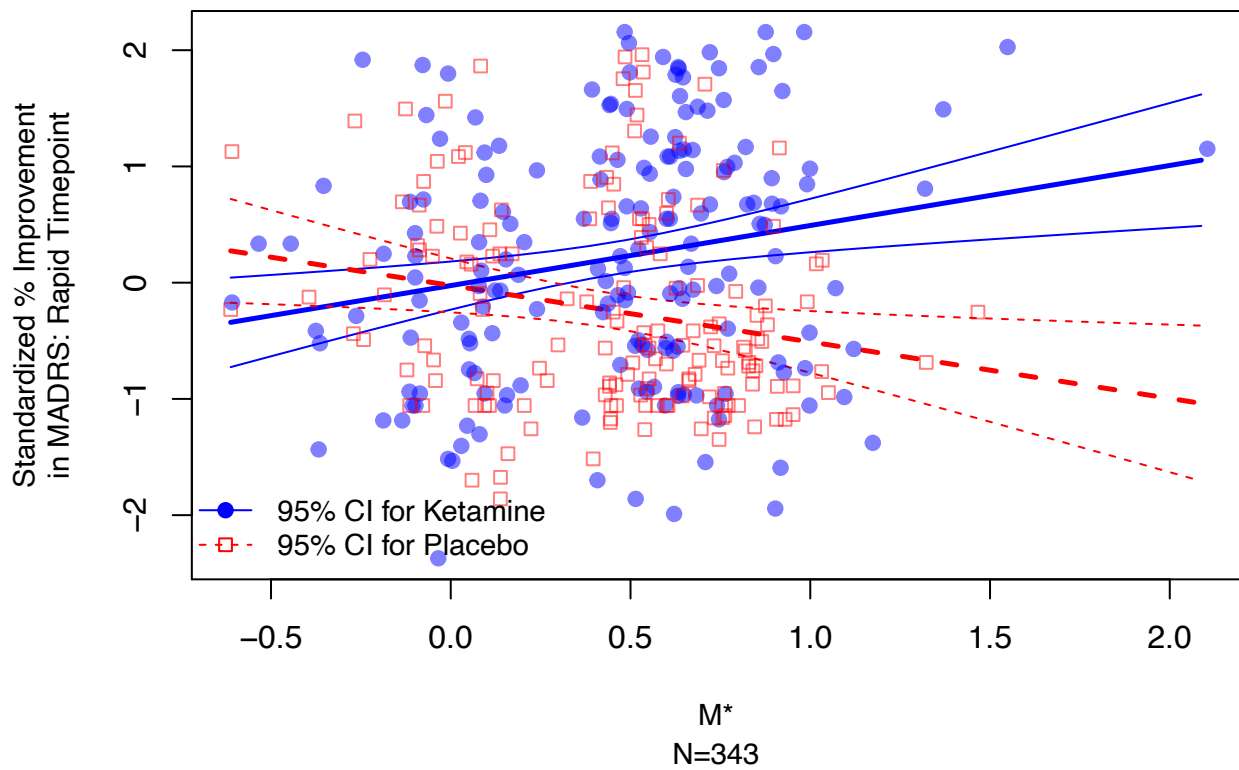

Tier2d

| Variable                        | Moderator effect size (r) | Confidence interval | Statistically significant (per 95% CI)? | Weight |
|---------------------------------|---------------------------|---------------------|-----------------------------------------|--------|
| Study-level TRD Threshold >= 2  | 0.140                     | (0.047, 0.224)      | Yes                                     | 1.06   |
| Inpatient vs. Outpatient        | -0.023                    | (-0.102, 0.071)     | No                                      | 0.577  |
| Major Depressive Disorder (MDD) | 0.006                     | (-0.094, 0.082)     | No                                      | -0.461 |
| Study Performed in the US (y/n) | 0.045                     | (-0.035, 0.120)     | No                                      | 0.063  |
| Age                             | 0.040                     | (-0.044, 0.116)     | No                                      | 0.065  |
| Female or Male                  | 0.067                     | (-0.030, 0.163)     | No                                      | 0.472  |
| Generalized Anxiety Disorder    | 0.017                     | (-0.077, 0.094)     | No                                      | -0.259 |
| Any Anxiety Disorder            | -0.015                    | (-0.103, 0.063)     | No                                      | 0.212  |
| Overall                         | 0.191                     | (0.098, 0.272)      | Yes                                     |        |

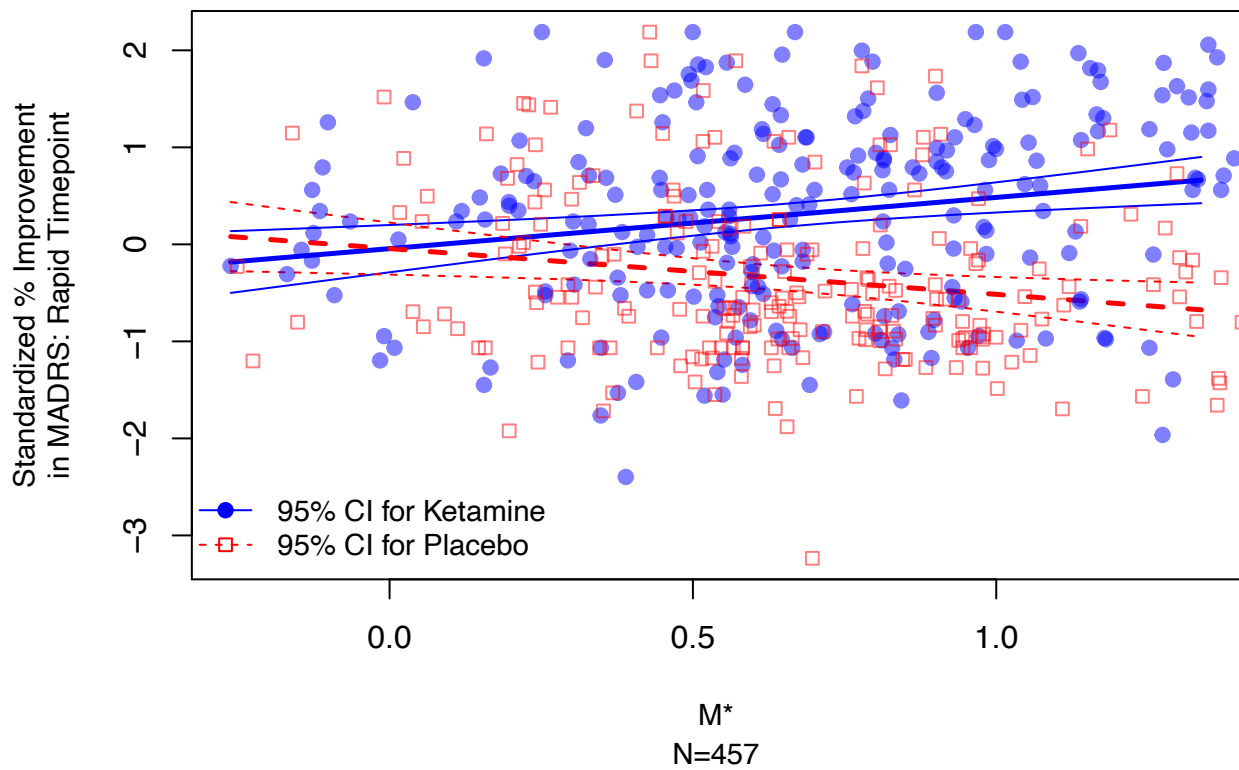

Tier2e

| Variable                        | Moderator effect size (r) | Confidence interval | Statistically significant (per 95% CI)? | Weight |
|---------------------------------|---------------------------|---------------------|-----------------------------------------|--------|
| Study-level TRD Threshold >= 2  | 0.126                     | (0.021, 0.225)      | Yes                                     | 0.418  |
| Inpatient vs. Outpatient        | -0.124                    | (-0.213, -0.010)    | No                                      | -0.859 |
| Major Depressive Disorder (MDD) | 0.016                     | (-0.088, 0.148)     | No                                      | -0.458 |
| Study Performed in the US (y/n) | 0.030                     | (-0.053, 0.126)     | No                                      | -0.228 |
| Age                             | 0.032                     | (-0.039, 0.117)     | No                                      | 0.208  |
| Female or Male                  | 0.052                     | (-0.034, 0.162)     | No                                      | 0.288  |
| Systolic Blood Pressure         | 0.059                     | (-0.048, 0.159)     | No                                      | 0.132  |
| Diastolic Blood Pressure        | 0.042                     | (-0.061, 0.142)     | No                                      | -0.126 |
| Overall                         | 0.165                     | (0.078, 0.243)      | Yes                                     |        |

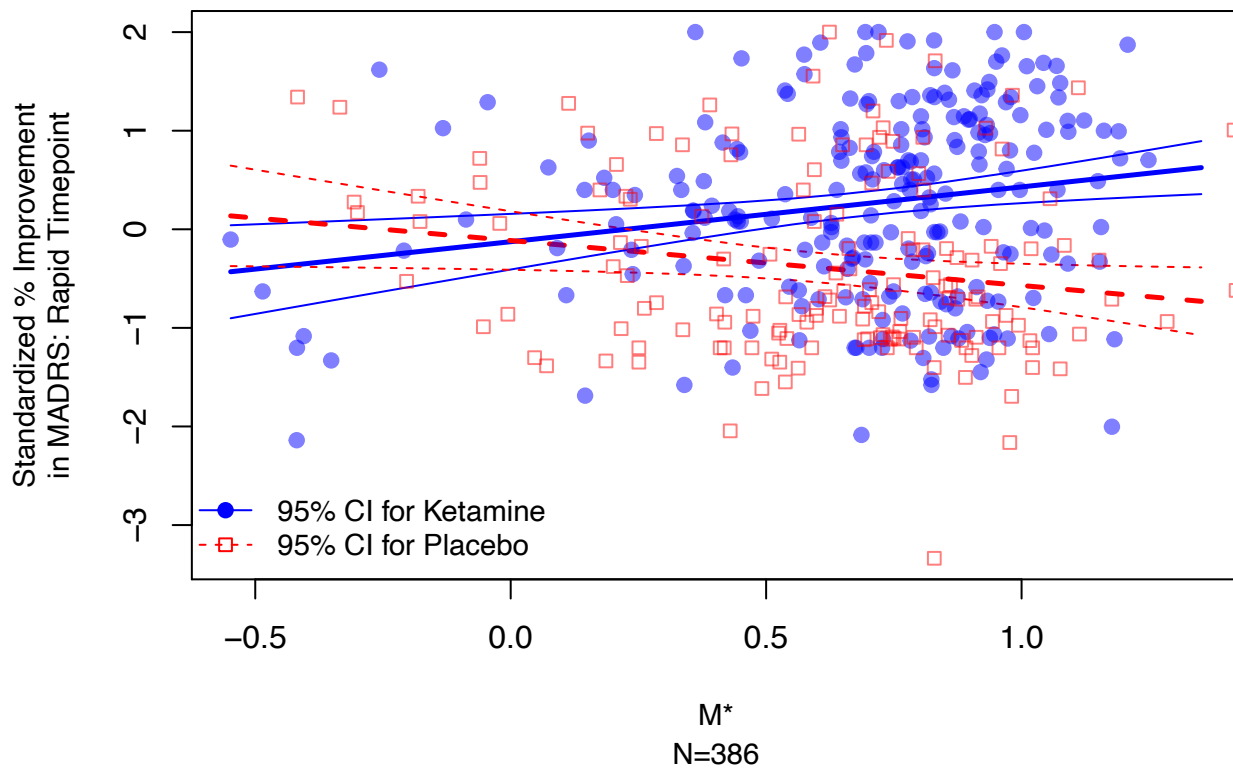

Tier2f

| Variable                        | Moderator effect size (r) | Confidence interval | Statistically significant (per 95% CI)? | Weight |
|---------------------------------|---------------------------|---------------------|-----------------------------------------|--------|
| Study-level TRD Threshold >= 2  | 0.151                     | (0.037, 0.263)      | Yes                                     | 1.091  |
| Inpatient vs. Outpatient        | 0.016                     | (-0.107, 0.125)     | No                                      | 0.108  |
| Major Depressive Disorder (MDD) | -0.062                    | (-0.175, 0.039)     | No                                      | -0.677 |
| Study Performed in the US (y/n) | 0.167                     | (0.062, 0.286)      | Yes                                     | 0.619  |
| Age                             | 0.049                     | (-0.058, 0.136)     | No                                      | -0.125 |
| Female or Male                  | -0.024                    | (-0.155, 0.094)     | No                                      | -0.153 |
| Smoker (Dummy-Coded)            | -0.028                    | (-0.160, 0.077)     | No                                      | -0.167 |
| BMI                             | 0.111                     | (-0.035, 0.231)     | No                                      | 0.313  |
| Overall                         | 0.293                     | (0.175, 0.415)      | Yes                                     |        |

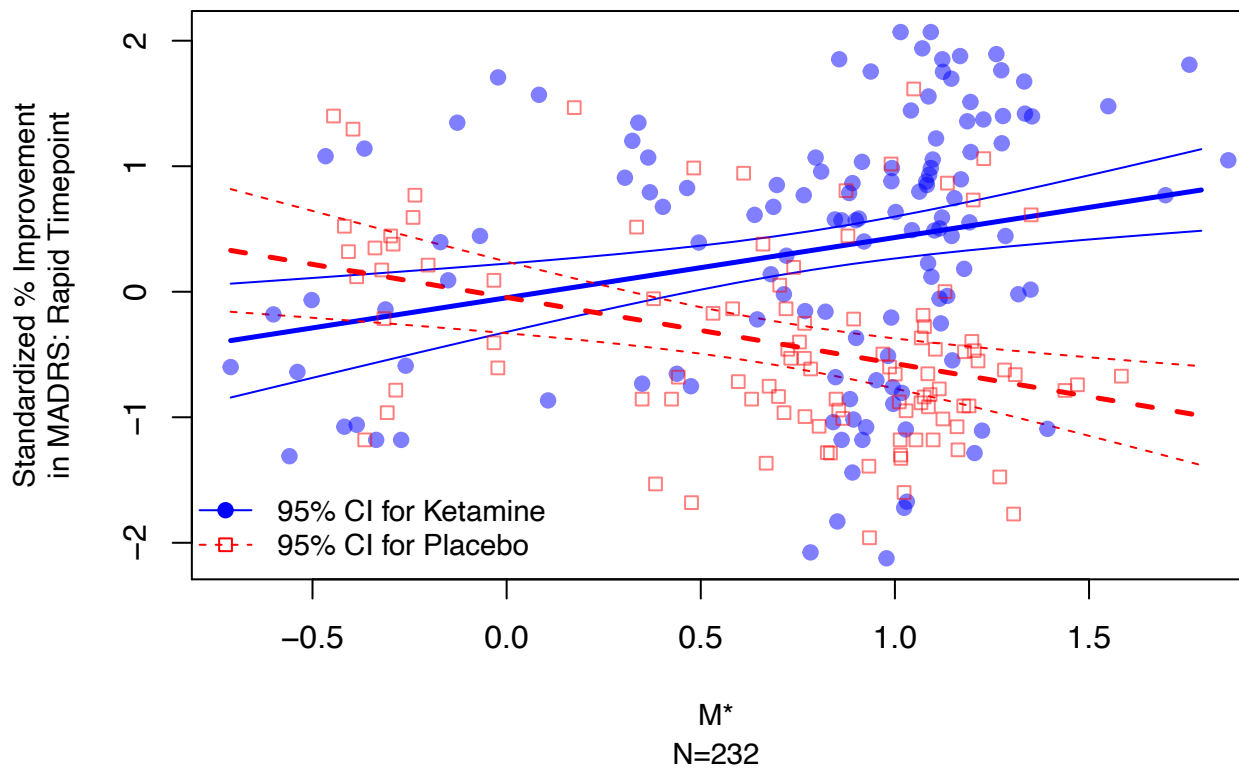



Tier2g

| Variable                        | Moderator effect size (r) | Confidence interval | Statistically significant (per 95% CI)? | Weight |
|---------------------------------|---------------------------|---------------------|-----------------------------------------|--------|
| Study-level TRD Threshold >= 2  | 0.058                     | (-0.040, 0.147)     | No                                      | 0.615  |
| Inpatient vs. Outpatient        | -0.047                    | (-0.150, 0.057)     | No                                      | 0.239  |
| Major Depressive Disorder (MDD) | 0.019                     | (-0.091, 0.115)     | No                                      | -0.543 |
| Study Performed in the US (y/n) | 0.036                     | (-0.047, 0.120)     | No                                      | 0.014  |
| Age                             | 0.034                     | (-0.044, 0.123)     | No                                      | -0.014 |
| Female or Male                  | 0.055                     | (-0.037, 0.137)     | No                                      | 0.313  |
| Years of Education              | 0.012                     | (-0.076, 0.104)     | No                                      | -0.011 |
| Marital Status                  | -0.043                    | (-0.138, 0.042)     | No                                      | 0.046  |
| Overall                         | 0.118                     | (0.024, 0.199)      | Yes                                     |        |

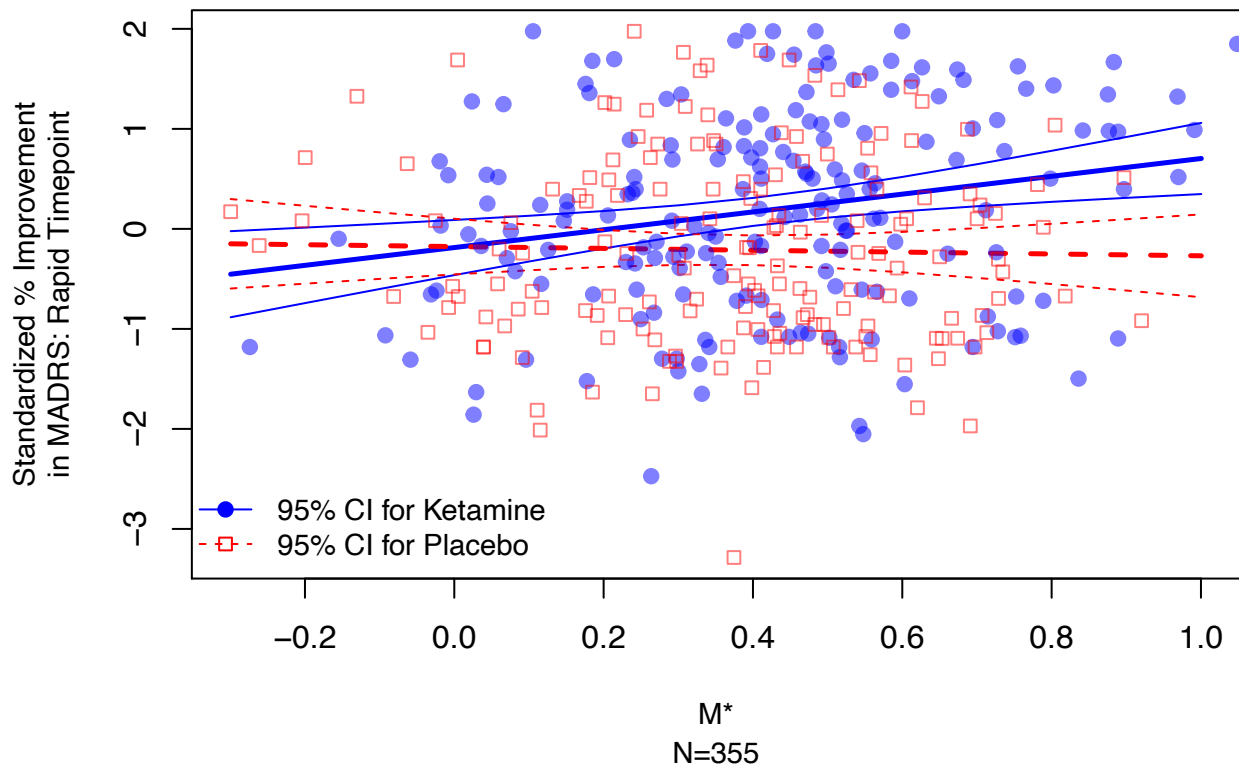

# Post-rapid effects

## Tier 1

| Variable                           | Moderator effect size (r) | Confidence interval | Statistically significant (per 95% CI)? | Weight |
|------------------------------------|---------------------------|---------------------|-----------------------------------------|--------|
| Study-level TRD Threshold $\geq 2$ | 0.108                     | (0.038, 0.174)      | Yes                                     | 0.657  |
| Inpatient vs. Outpatient           | 0.006                     | (-0.056, 0.073)     | No                                      | -0.112 |
| Major Depressive Disorder (MDD)    | -0.027                    | (-0.107, 0.042)     | No                                      | -0.463 |
| Study Performed in the US (y/n)    | 0.089                     | (0.013, 0.160)      | Yes                                     | -0.132 |
| Age                                | 0.061                     | (-0.013, 0.129)     | No                                      | 0.114  |
| Female or Male                     | -0.031                    | (-0.096, 0.052)     | No                                      | -0.155 |
| Overall                            | 0.144                     | (0.074, 0.220)      | Yes                                     |        |

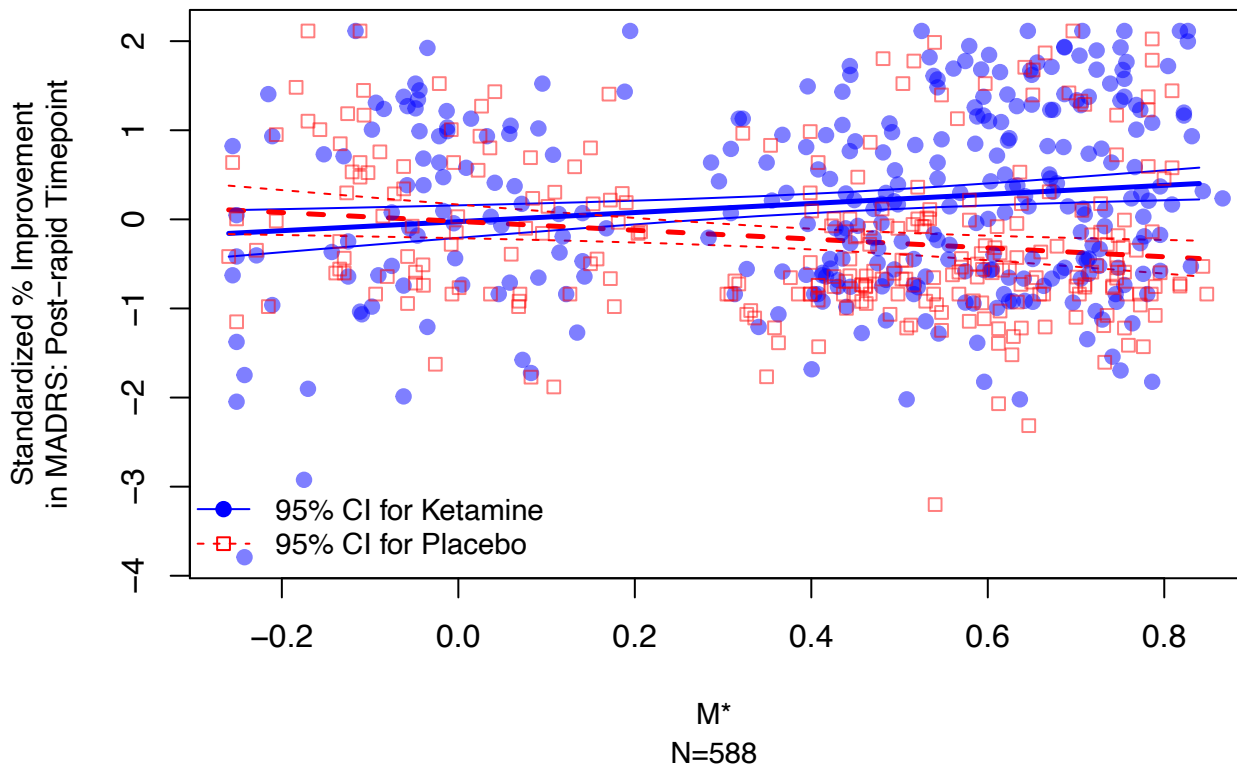

Tier2a

| Variable                        | Moderator effect size (r) | Confidence interval | Statistically significant (per 95% CI)? | Weight |
|---------------------------------|---------------------------|---------------------|-----------------------------------------|--------|
| Study-level TRD Threshold >= 2  | 0.104                     | (0.027, 0.199)      | Yes                                     | 0.608  |
| Inpatient vs. Outpatient        | 0.021                     | (-0.052, 0.093)     | No                                      | 0.577  |
| Major Depressive Disorder (MDD) | -0.039                    | (-0.116, 0.051)     | No                                      | -0.083 |
| Study Performed in the US (y/n) | 0.116                     | (0.027, 0.195)      | Yes                                     | 0.55   |
| Age                             | 0.079                     | (0.003, 0.154)      | Yes                                     | 0.073  |
| Female or Male                  | -0.063                    | (-0.143, 0.013)     | No                                      | -0.406 |
| Race is White (y/n)             | -0.044                    | (-0.127, 0.048)     | No                                      | -0.151 |
| Race is Black (y/n)             | 0.074                     | (0.002, 0.159)      | Yes                                     | 0.124  |
| Race is Asian (y/n)             | 0.019                     | (-0.051, 0.095)     | No                                      | 0.553  |
| Race is Other (y/n)             | -0.028                    | (-0.126, 0.043)     | No                                      | 0      |
| Overall                         | 0.169                     | (0.076, 0.239)      | Yes                                     |        |

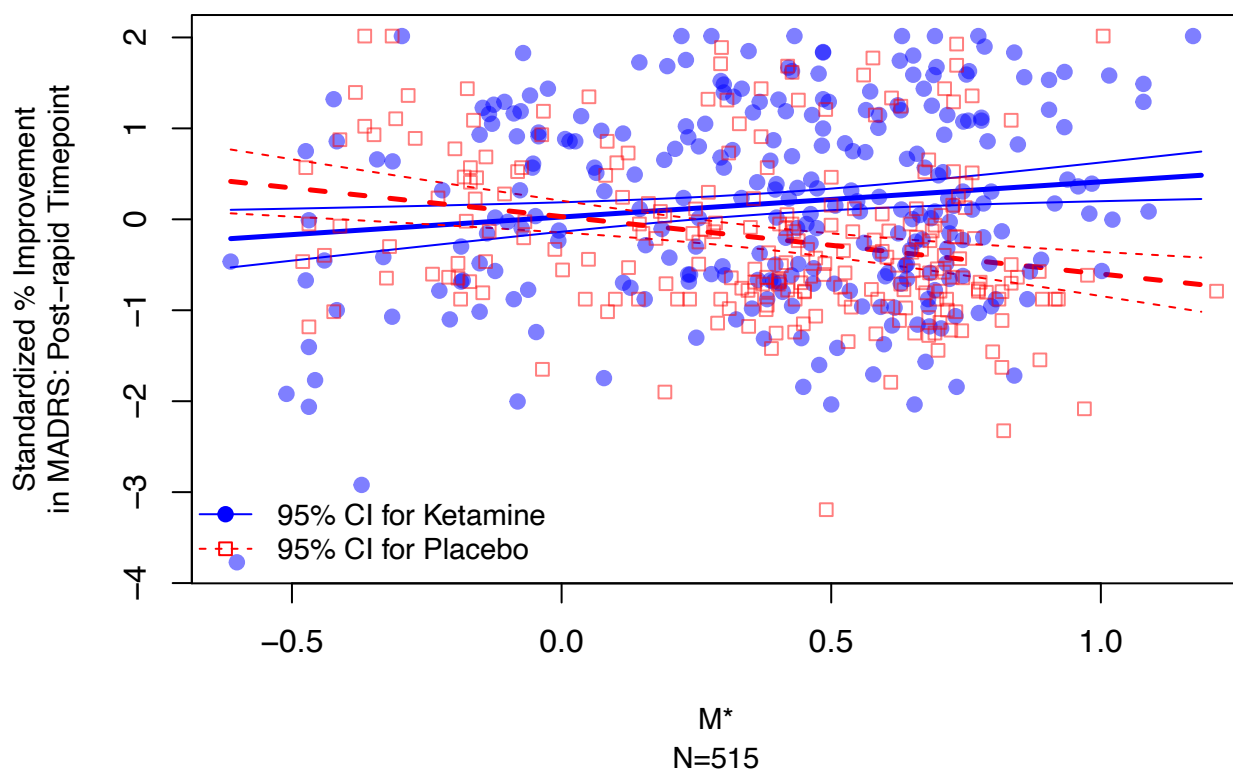

Tier2b

| Variable                        | Moderator effect size (r) | Confidence interval | Statistically significant (per 95% CI)? | Weight |
|---------------------------------|---------------------------|---------------------|-----------------------------------------|--------|
| Study-level TRD Threshold >= 2  | 0.158                     | (0.074, 0.239)      | Yes                                     | 0.925  |
| Inpatient vs. Outpatient        | 0.020                     | (-0.050, 0.093)     | No                                      | 0      |
| Major Depressive Disorder (MDD) | -0.020                    | (-0.096, 0.063)     | No                                      | -0.536 |
| Study Performed in the US (y/n) | 0.119                     | (0.019, 0.205)      | Yes                                     | 0.219  |
| Age                             | 0.066                     | (-0.018, 0.156)     | No                                      | 0.038  |
| Female or Male                  | -0.011                    | (-0.101, 0.077)     | No                                      | 0.292  |
| Any Concurrent Psych Med (y/n)  | 0.002                     | (-0.084, 0.087)     | No                                      | -0.264 |
| Any Benzodiazepine (y/n)        | 0.015                     | (-0.048, 0.104)     | No                                      | -0.109 |
| Overall                         | 0.199                     | (0.121, 0.283)      | Yes                                     |        |

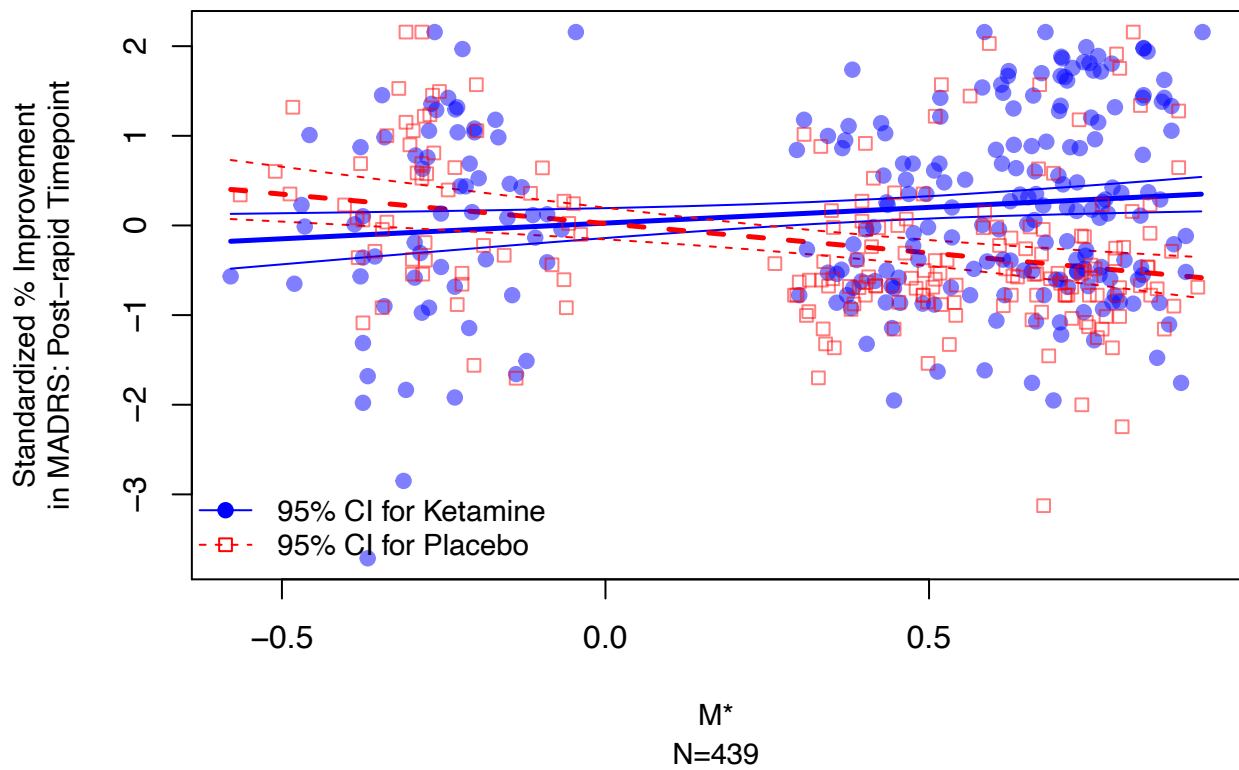

Tier2c

| Variable                         | Moderator effect size (r) | Confidence interval | Statistically significant (per 95% CI)? | Weight |
|----------------------------------|---------------------------|---------------------|-----------------------------------------|--------|
| Study-level TRD Threshold >= 2   | 0.093                     | (-0.006, 0.207)     | No                                      | 0.332  |
| Inpatient vs. Outpatient         | -0.053                    | (-0.178, 0.047)     | No                                      | -0.312 |
| Major Depressive Disorder (MDD)  | -0.019                    | (-0.111, 0.075)     | No                                      | -0.437 |
| Study Performed in the US (y/n)  | 0.113                     | (0.004, 0.219)      | Yes                                     | 0.449  |
| Age                              | 0.056                     | (-0.047, 0.176)     | No                                      | 0.308  |
| Female or Male                   | 0.089                     | (-0.042, 0.208)     | No                                      | 0.629  |
| Duration of Current MDE (months) | -0.065                    | (-0.186, 0.030)     | No                                      | -0.273 |
| Recurrent MDD (y/n)              | 0.055                     | (-0.053, 0.181)     | No                                      | -0.749 |
| Number of Depressive Episodes    | 0.096                     | (-0.003, 0.205)     | No                                      | 0.17   |
| Overall                          | 0.210                     | (0.107, 0.313)      | Yes                                     |        |

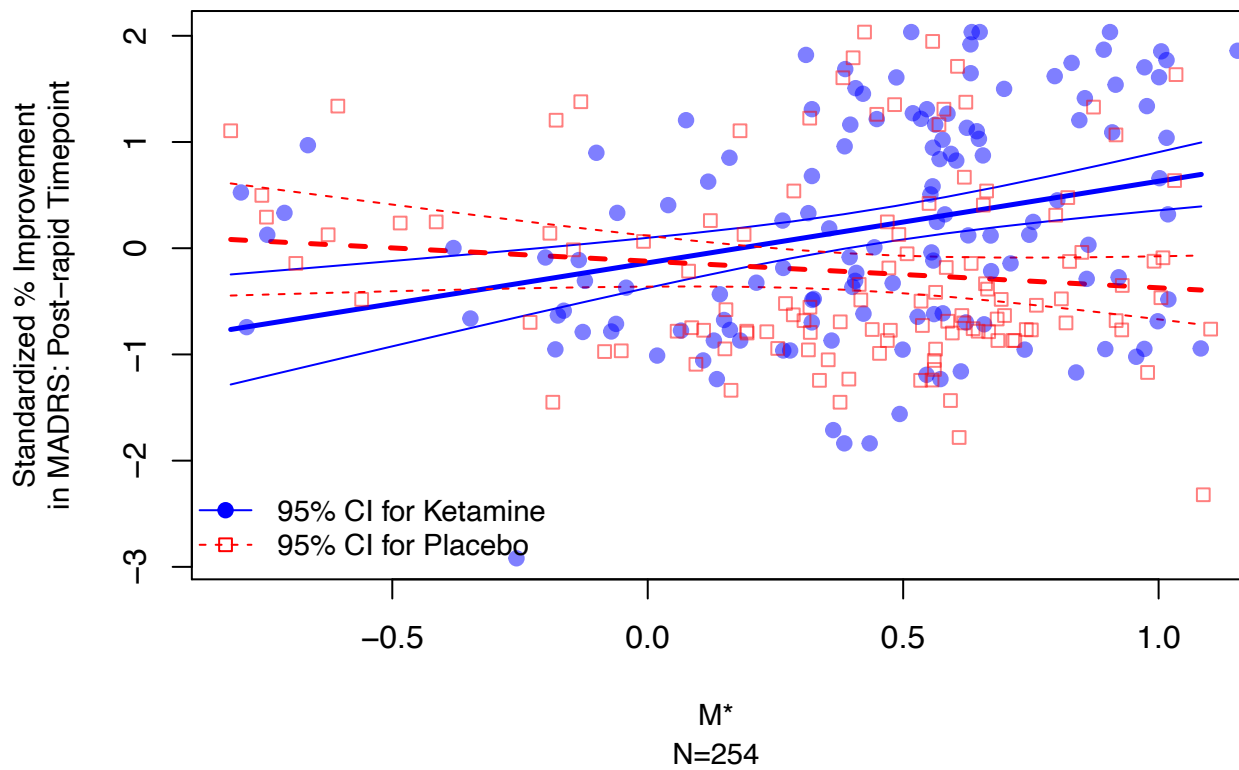

Tier2d

| Variable                        | Moderator effect size (r) | Confidence interval | Statistically significant (per 95% CI)? | Weight |
|---------------------------------|---------------------------|---------------------|-----------------------------------------|--------|
| Study-level TRD Threshold >= 2  | 0.090                     | (0.007, 0.195)      | Yes                                     | 0.372  |
| Inpatient vs. Outpatient        | -0.027                    | (-0.123, 0.052)     | No                                      | -0.525 |
| Major Depressive Disorder (MDD) | 0.001                     | (-0.085, 0.095)     | No                                      | -0.514 |
| Study Performed in the US (y/n) | 0.069                     | (-0.022, 0.164)     | No                                      | 0.438  |
| Age                             | -0.040                    | (-0.143, 0.060)     | No                                      | -0.128 |
| Female or Male                  | 0.037                     | (-0.053, 0.150)     | No                                      | 0.34   |
| Generalized Anxiety Disorder    | -0.026                    | (-0.146, 0.089)     | No                                      | -0.009 |
| Any Anxiety Disorder            | -0.003                    | (-0.106, 0.111)     | No                                      | -0.161 |
| Overall                         | 0.156                     | (0.042, 0.247)      | Yes                                     |        |

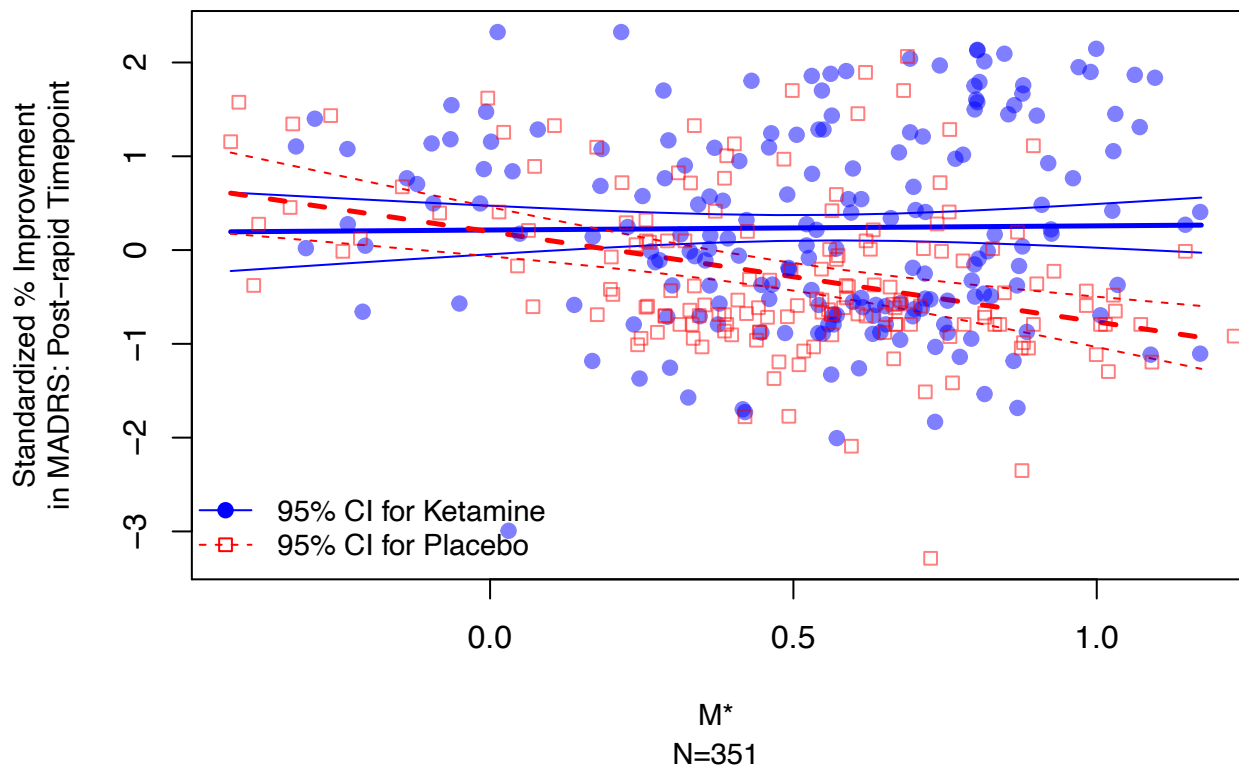

Tier2e

| Variable                        | Moderator effect size (r) | Confidence interval | Statistically significant (per 95% CI)? | Weight |
|---------------------------------|---------------------------|---------------------|-----------------------------------------|--------|
| Study-level TRD Threshold >= 2  | 0.158                     | (0.040, 0.246)      | Yes                                     | 0.937  |
| Inpatient vs. Outpatient        | -0.105                    | (-0.195, -0.019)    | No                                      | -0.709 |
| Major Depressive Disorder (MDD) | -0.009                    | (-0.111, 0.085)     | No                                      | -1.223 |
| Study Performed in the US (y/n) | 0.070                     | (-0.029, 0.171)     | No                                      | -0.124 |
| Age                             | 0.059                     | (-0.047, 0.152)     | No                                      | 0.108  |
| Female or Male                  | -0.063                    | (-0.176, 0.036)     | No                                      | -0.111 |
| Systolic Blood Pressure         | 0.106                     | (-0.006, 0.207)     | No                                      | 0.168  |
| Diastolic Blood Pressure        | 0.032                     | (-0.073, 0.112)     | No                                      | 0.065  |
| Overall                         | 0.228                     | (0.139, 0.322)      | Yes                                     |        |

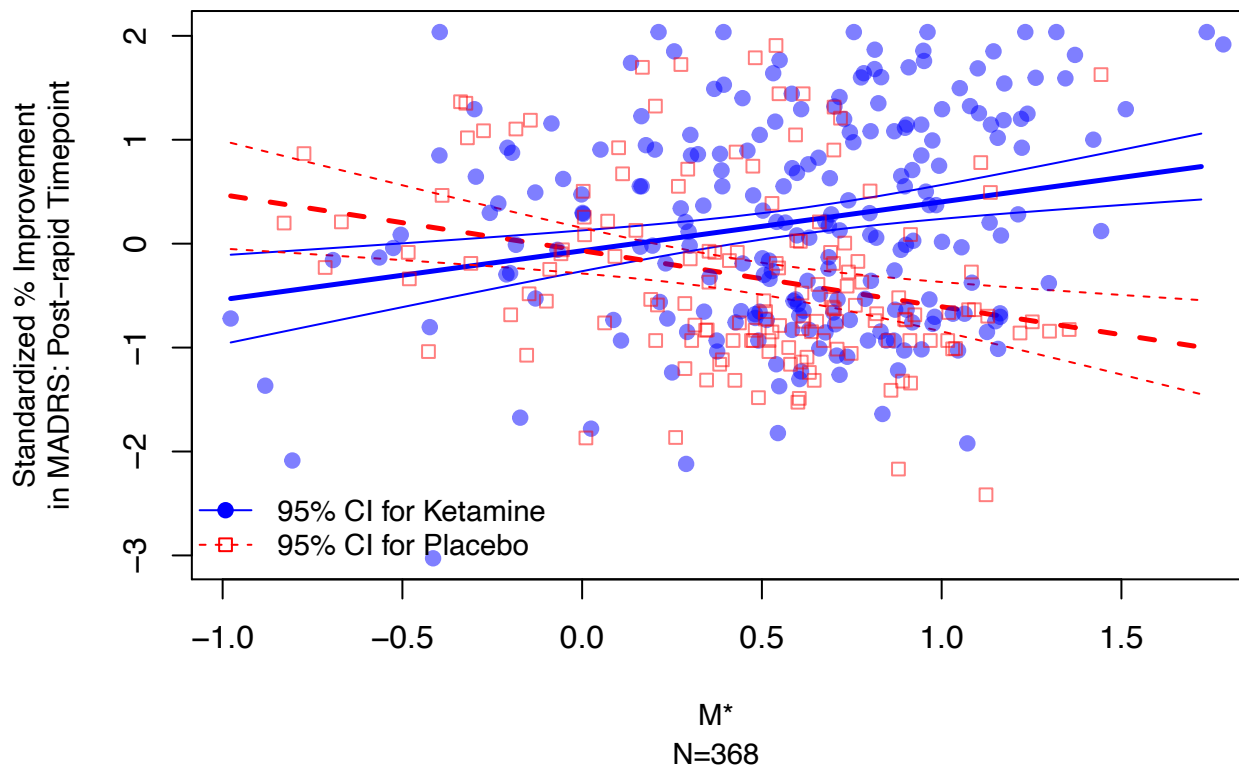

Tier2f

| Variable                        | Moderator effect size (r) | Confidence interval | Statistically significant (per 95% CI)? | Weight |
|---------------------------------|---------------------------|---------------------|-----------------------------------------|--------|
| Study-level TRD Threshold >= 2  | 0.103                     | (0.005, 0.214)      | Yes                                     | 0.256  |
| Inpatient vs. Outpatient        | -0.093                    | (-0.209, 0.019)     | No                                      | -0.286 |
| Major Depressive Disorder (MDD) | 0.020                     | (-0.086, 0.124)     | No                                      | 0.1    |
| Study Performed in the US (y/n) | 0.068                     | (-0.034, 0.165)     | No                                      | 0.448  |
| Age                             | -0.098                    | (-0.212, 0.038)     | No                                      | -0.328 |
| Female or Male                  | 0.082                     | (-0.026, 0.224)     | No                                      | 0.039  |
| Smoker (Dummy-Coded)            | -0.035                    | (-0.156, 0.077)     | No                                      | 0.471  |
| BMI                             | 0.112                     | (0.026, 0.249)      | Yes                                     | 0.106  |
| Overall                         | 0.234                     | (0.118, 0.347)      | Yes                                     |        |

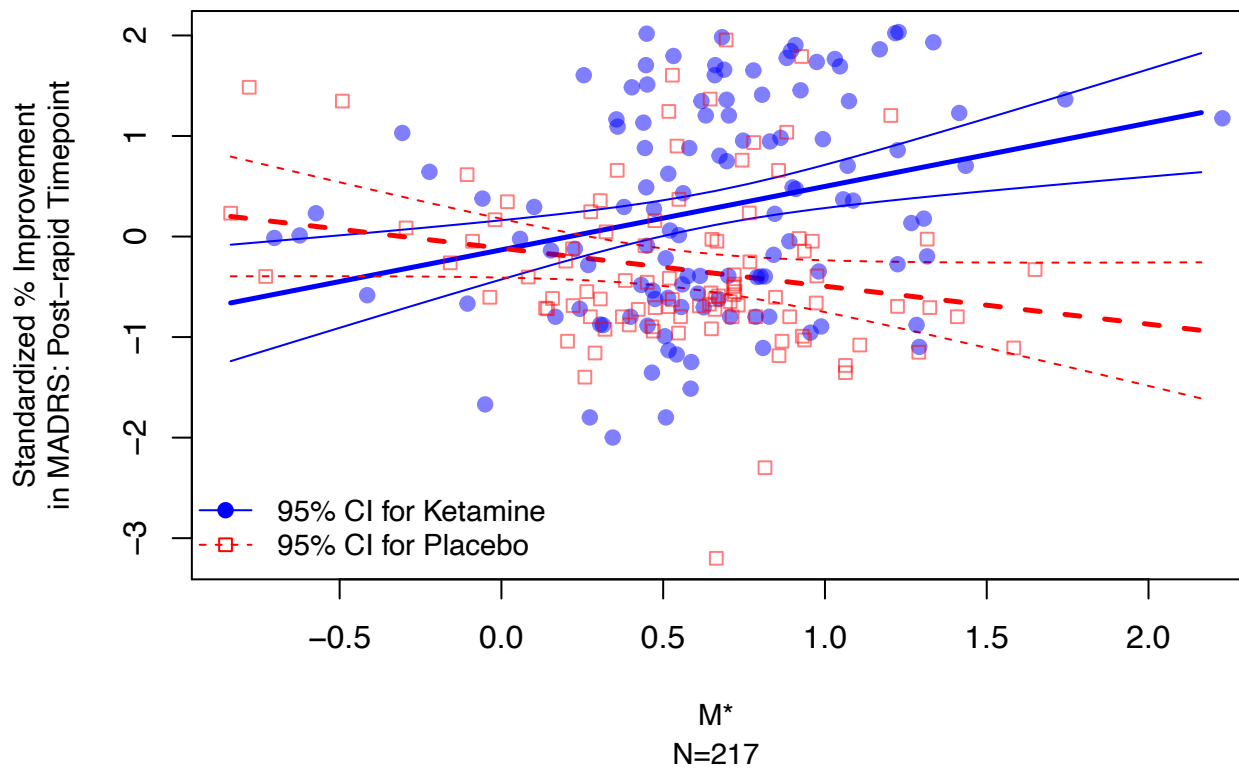



Tier2g

| Variable                           | Moderator effect size (r) | Confidence interval | Statistically significant (per 95% CI)? | Weight |
|------------------------------------|---------------------------|---------------------|-----------------------------------------|--------|
| Study-level TRD Threshold $\geq 2$ | 0.053                     | (-0.070, 0.189)     | No                                      | 0.106  |
| Inpatient vs. Outpatient           | -0.101                    | (-0.182, -0.023)    | No                                      | -0.587 |
| Major Depressive Disorder (MDD)    | -0.041                    | (-0.149, 0.086)     | No                                      | -0.282 |
| Study Performed in the US (y/n)    | 0.070                     | (-0.022, 0.181)     | No                                      | 0.165  |
| Age                                | 0.021                     | (-0.106, 0.137)     | No                                      | -0.089 |
| Female or Male                     | -0.045                    | (-0.166, 0.041)     | No                                      | -0.201 |
| Years of Education                 | 0.003                     | (-0.118, 0.118)     | No                                      | -0.013 |
| Marital Status                     | -0.077                    | (-0.202, 0.048)     | No                                      | -0.058 |
| Overall                            | 0.151                     | (0.015, 0.275)      | Yes                                     |        |

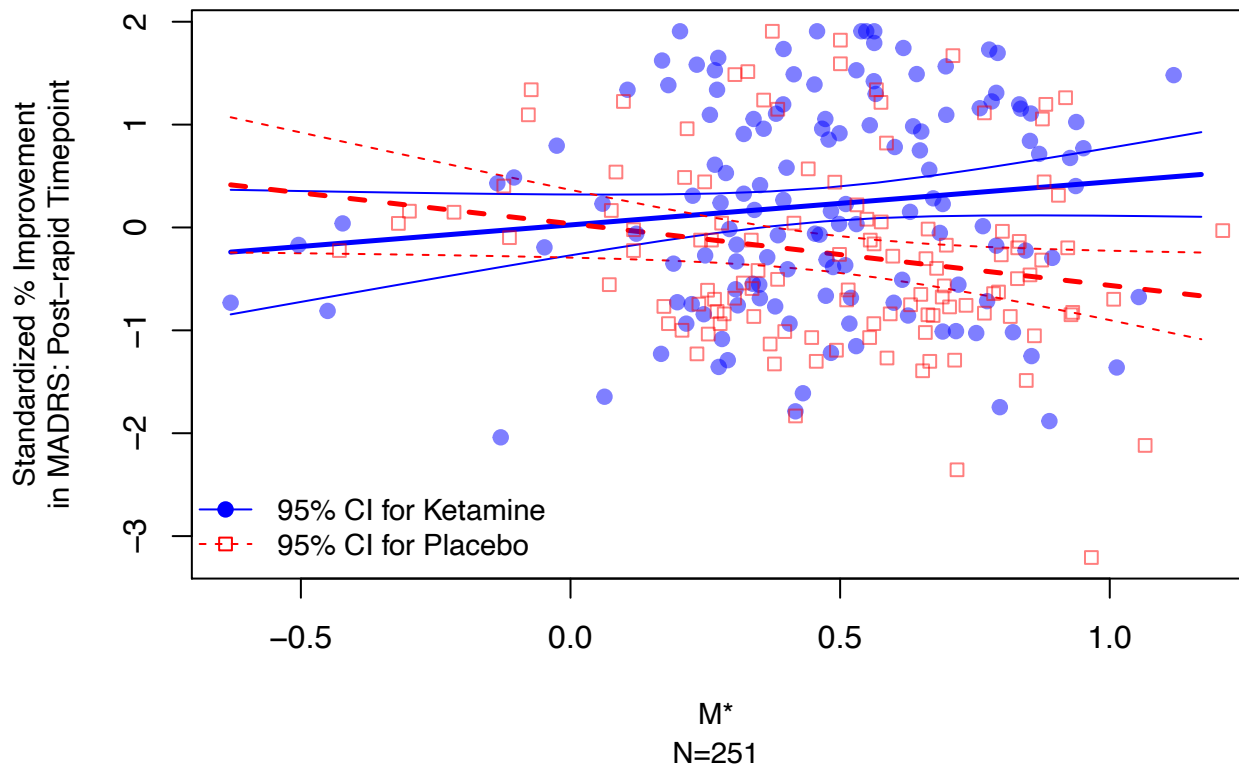

Supplement: 41380_2022_1757_MOESM2_ESM.pdf [file 41380_2022_1757_MOESM2_ESM.pdf]
